# Supplementary material for: Exploratory Full-Field Mechanical Analysis across the Osteochondral Tissue—Biomaterial Interface in an Ovine Model
Source: MDPI journal article supplement (doi:10.3390/ma13183911), 2020-09-04

*Supplementary*

# **Exploratory Full-Field Mechanical Analysis across the Osteochondral Tissue—Biomaterial Interface in an Ovine Model**

Jeffrey N. Clark <sup>1,2</sup>, Agathe Heyraud <sup>2</sup>, Saman Tavana <sup>1</sup>, Talal Al-Jabri <sup>3</sup>, Francesca Tallia <sup>2</sup>, Brett Clark <sup>4</sup>, Gordon W. Blunn <sup>5</sup>, Justin P. Cobb <sup>3</sup>, Ulrich Hansen <sup>1</sup>, Julian R. Jones <sup>2</sup> and Jonathan R.T. Jeffers <sup>1,\*</sup>

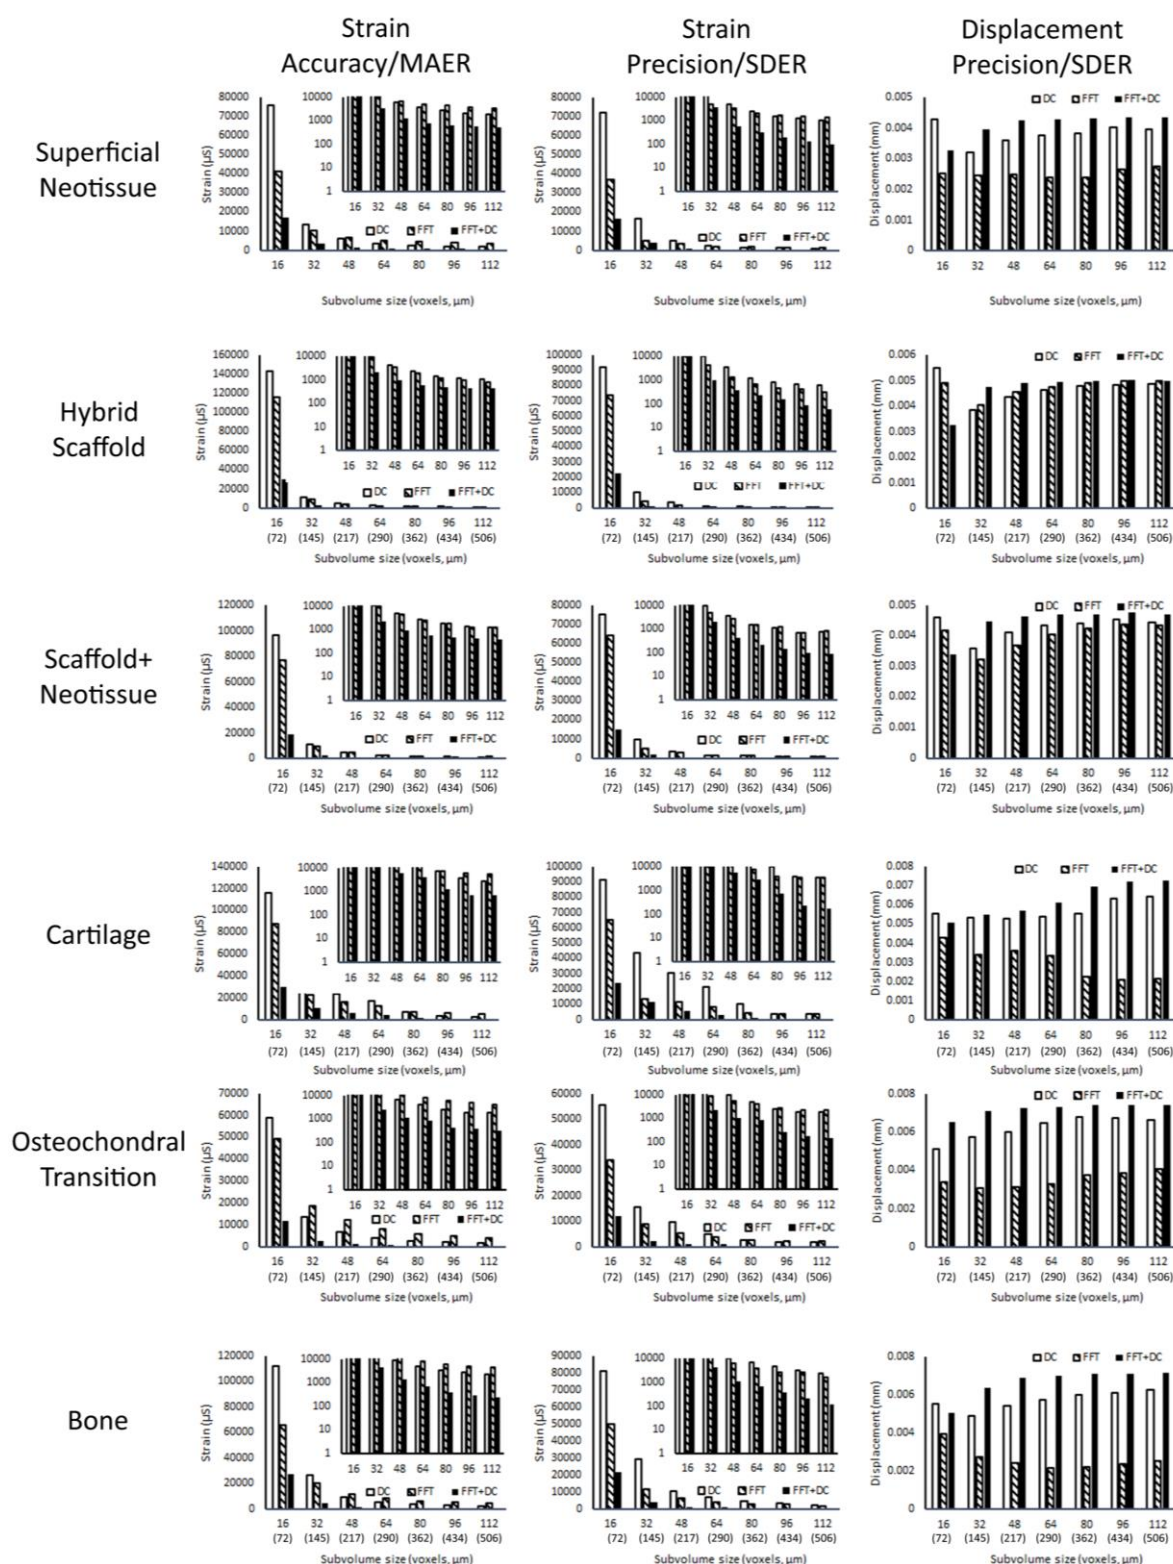

**Figure 1.** Strain and displacement errors, across a range of subvolume sizes, for each of the tissue components on the sample ( $n = 1$ ), derived under constant strain conditions for in situ mechanical tested during micro-CT scanning. Please note the logarithmic scale for the inset panels.

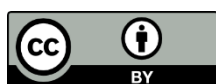

Supplement: s1 [file s1]
